# Supplementary material
Source: HighWire-hosted journal article supplement (https://bmjopen.bmj.com/content/7/12/e018587)
Supplement: inline-supplementary-material-8 [file inline-supplementary-material-8.pdf]

Supplemental file S2 bis: Total number of patients to be included in post-marketing studies for each drug

| <b>Drug</b>           | <b>Total number of patients to be included in post-marketing studies</b> | <b>Percentage of industry funders</b> | <b>Percentage of non-industry funders</b> |
|-----------------------|--------------------------------------------------------------------------|---------------------------------------|-------------------------------------------|
| Varenicline           | 1045002                                                                  | 90.8                                  | 9.2                                       |
| Saxagliptin           | 785853                                                                   | 99.6                                  | 0.4                                       |
| Exenatide             | 420256                                                                   | 99.3                                  | 0.7                                       |
| Dabigatran            | 368063                                                                   | 93.1                                  | 6.9                                       |
| Abatacept             | 240227                                                                   | 99.6                                  | 0.4                                       |
| Prasugrel             | 128744                                                                   | 66.9                                  | 33.1                                      |
| Sitagliptin           | 113824                                                                   | 91.8                                  | 8.2                                       |
| Ranibizumab           | 89765                                                                    | 81.9                                  | 18.1                                      |
| Aliskiren             | 76864                                                                    | 96.6                                  | 3.4                                       |
| Sorafenib             | 76434                                                                    | 66.2                                  | 33.8                                      |
| Liraglutide           | 73106                                                                    | 92.0                                  | 8.0                                       |
| Lenalidomide          | 60805                                                                    | 62.8                                  | 37.2                                      |
| Lapatinib             | 45881                                                                    | 77.4                                  | 22.6                                      |
| Paliperidone          | 43024                                                                    | 92.6                                  | 7.4                                       |
| Micafungin            | 41363                                                                    | 95.0                                  | 5.0                                       |
| Entecavir             | 39787                                                                    | 65.5                                  | 34.5                                      |
| Darunavir             | 39773                                                                    | 94.7                                  | 5.3                                       |
| Certolizumab pegol    | 37523                                                                    | 91.6                                  | 8.4                                       |
| Sunitinib             | 37320                                                                    | 70.7                                  | 29.3                                      |
| Tocilizumab           | 36262                                                                    | 91.8                                  | 8.2                                       |
| Denosumab             | 32688                                                                    | 90.2                                  | 9.8                                       |
| Raltegravir           | 31285                                                                    | 60.8                                  | 39.2                                      |
| Lacosamide            | 30236                                                                    | 93.9                                  | 6.1                                       |
| Fesoterodine fumarate | 23699                                                                    | 97.2                                  | 2.8                                       |
| Panitumumab           | 22585                                                                    | 66.9                                  | 33.1                                      |
| Methoxy polyethylene  | 22102                                                                    | 99.2                                  | 0.8                                       |
| Ustekinumab           | 20873                                                                    | 95.5                                  | 4.5                                       |
| Pazopanib             | 19332                                                                    | 54.1                                  | 45.9                                      |
| Tigecycline           | 19322                                                                    | 89.3                                  | 10.7                                      |
| Dasatinib             | 19320                                                                    | 72.2                                  | 27.8                                      |
| Golimumab             | 18801                                                                    | 90.1                                  | 9.9                                       |
| Silodosin             | 17591                                                                    | 97.5                                  | 2.5                                       |
| Febuxostat            | 16330                                                                    | 88.8                                  | 11.2                                      |
| Nilotinib             | 15657                                                                    | 77.0                                  | 23.0                                      |
| Canakinumab           | 15418                                                                    | 98.2                                  | 1.8                                       |
| Telbivudine           | 13590                                                                    | 55.6                                  | 44.4                                      |
| Tolvaptan             | 13552                                                                    | 89.7                                  | 10.3                                      |
| Plerixafor            | 13450                                                                    | 84.6                                  | 15.4                                      |
| Ambrisentan           | 12300                                                                    | 46.1                                  | 53.9                                      |

| <b>Drug</b>              | <b>Total number of patients to be included in post-marketing studies</b> | <b>Percentage of industry funders</b> | <b>Percentage of non-industry funders</b> |
|--------------------------|--------------------------------------------------------------------------|---------------------------------------|-------------------------------------------|
| Rotigotine               | 12258                                                                    | 96.8                                  | 3.2                                       |
| Maraviroc                | 11957                                                                    | 74.3                                  | 25.7                                      |
| Dronedarone              | 10947                                                                    | 62.7                                  | 37.3                                      |
| Degarelix                | 10811                                                                    | 93.0                                  | 7.0                                       |
| Ranolazine               | 10614                                                                    | 69.8                                  | 30.2                                      |
| Deferasirox              | 8812                                                                     | 86.4                                  | 13.6                                      |
| Ofatumumab               | 7988                                                                     | 84.0                                  | 16.0                                      |
| Nepafenac                | 7627                                                                     | 86.2                                  | 13.8                                      |
| Sapropterin              | 6328                                                                     | 90.3                                  | 9.7                                       |
| Eculizumab               | 6065                                                                     | 95.5                                  | 4.5                                       |
| Eltrombopag              | 5590                                                                     | 85.2                                  | 14.8                                      |
| Mecasermin               | 5291                                                                     | 88.5                                  | 11.5                                      |
| Ulipristal               | 4932                                                                     | 90.9                                  | 9.1                                       |
| Etravirine               | 4881                                                                     | 46.4                                  | 53.6                                      |
| Retapamulin              | 4819                                                                     | 95.6                                  | 4.4                                       |
| Posaconazole             | 4391                                                                     | 65.1                                  | 34.9                                      |
| Collagenase clostridium  | 3897                                                                     | 91.2                                  | 8.8                                       |
| Anidulafungin            | 3819                                                                     | 70.8                                  | 29.2                                      |
| Methylnaltrexone bromide | 3581                                                                     | 96.6                                  | 3.4                                       |
| Doripenem                | 3204                                                                     | 87.3                                  | 12.7                                      |
| Nelarabine               | 3104                                                                     | 15.6                                  | 84.4                                      |
| Rilonacept               | 2790                                                                     | 84.1                                  | 15.9                                      |
| Asenapine maleate        | 2179                                                                     | 100.0                                 | 0.0                                       |
| Romiplostim              | 1627                                                                     | 95.1                                  | 4.9                                       |
| Tipranavir               | 1401                                                                     | 98.9                                  | 1.1                                       |
| Rufinamide               | 1174                                                                     | 76.3                                  | 23.7                                      |
| Alglucidase              | 803                                                                      | 61.4                                  | 38.6                                      |
| Idursulfase              | 408                                                                      | 80.4                                  | 19.6                                      |
| Galsulfase               | 269                                                                      | 100.0                                 | 0.0                                       |
| Velaglucerase alfa       | 67                                                                       | 100.0                                 | 0.0                                       |

Supplemental file S3 bis: Population in preapproval pivotal trials and post-marketing studies

| Drug                  | Population in preapproval pivotal trials | Population in post-marketing studies |                                |                                                                   |         |
|-----------------------|------------------------------------------|--------------------------------------|--------------------------------|-------------------------------------------------------------------|---------|
|                       |                                          | Another indication                   | Originally-approved indication | Both in originally approved indication and in other(s) indication | Total   |
| Dabigatran            | 18040                                    | 10896                                | 332151                         | 25016                                                             | 368063  |
| Prasugrel             | 13457                                    | 1960                                 | 126669                         | 115                                                               | 128744  |
| Denosumab             | 7808                                     | 15825                                | 16863                          | 0                                                                 | 32688   |
| Aliskiren             | 5663                                     | 20625                                | 56239                          | 0                                                                 | 76864   |
| Dronedarone           | 4604                                     | 20                                   | 10927                          | 0                                                                 | 10947   |
| Varenicline           | 4198                                     | 1847                                 | 1024229                        | 18926                                                             | 1045002 |
| Tocilizumab           | 4190                                     | 2201                                 | 34061                          | 0                                                                 | 36262   |
| Saxagliptin           | 4148                                     | 396                                  | 785457                         | 0                                                                 | 785853  |
| Febuxostat            | 4101                                     | 854                                  | 15476                          | 0                                                                 | 16330   |
| Liraglutide           | 3978                                     | 9509                                 | 62587                          | 1010                                                              | 73106   |
| Ulipristal            | 3754                                     | 4012                                 | 920                            | 0                                                                 | 4932    |
| Tigecycline           | 2758                                     | 1339                                 | 6291                           | 11692                                                             | 19322   |
| Methoxy polyethylene  | 2398                                     | 8                                    | 22094                          | 0                                                                 | 22102   |
| Golimumab             | 2297                                     | 1222                                 | 17579                          | 0                                                                 | 18801   |
| Asenapine maleate     | 2294                                     | 0                                    | 2179                           | 0                                                                 | 2179    |
| Sitagliptin           | 2220                                     | 2794                                 | 110745                         | 285                                                               | 113824  |
| Doripenem             | 2117                                     | 267                                  | 2937                           | 0                                                                 | 3204    |
| Ustekinumab           | 1996                                     | 3793                                 | 17080                          | 0                                                                 | 20873   |
| Fesoterodine fumarate | 1935                                     | 182                                  | 23517                          | 0                                                                 | 23699   |
| Entecavir             | 1814                                     | 0                                    | 39787                          | 0                                                                 | 39787   |
| Paliperidone          | 1665                                     | 2548                                 | 35755                          | 4721                                                              | 43024   |
| Micafungin            | 1643                                     | 1105                                 | 39983                          | 275                                                               | 41363   |
| Ranolazine            | 1593                                     | 2945                                 | 5773                           | 1896                                                              | 10614   |
| Exenatide             | 1446                                     | 2810                                 | 417301                         | 145                                                               | 420256  |
| Abatacept             | 1382                                     | 5622                                 | 234605                         | 0                                                                 | 240227  |
| Telbivudine           | 1367                                     | 0                                    | 13590                          | 0                                                                 | 13590   |
| Lacosamide            | 1308                                     | 1133                                 | 29103                          | 0                                                                 | 30236   |
| Etravirine            | 1203                                     | 0                                    | 4881                           | 0                                                                 | 4881    |
| Posaconazole          | 1202                                     | 1949                                 | 1282                           | 1160                                                              | 4391    |
| Rotigotine            | 1163                                     | 4067                                 | 7671                           | 520                                                               | 12258   |
| Tipranavir            | 1159                                     | 0                                    | 1365                           | 36                                                                | 1401    |
| Ranibizumab           | 1139                                     | 20541                                | 36906                          | 32318                                                             | 89765   |
| Rufinamide            | 1097                                     | 288                                  | 886                            | 0                                                                 | 1174    |
| Certolizumab pegol    | 1088                                     | 1200                                 | 33077                          | 3246                                                              | 37523   |
| Sildenafil            | 923                                      | 1339                                 | 16252                          | 0                                                                 | 17591   |
| Anidulafungin         | 857                                      | 792                                  | 2993                           | 34                                                                | 3819    |
| Sorafenib             | 769                                      | 54317                                | 18809                          | 3308                                                              | 76434   |
| Raltegravir           | 699                                      | 83                                   | 31202                          | 0                                                                 | 31285   |
| Nepafenac             | 688                                      | 815                                  | 6812                           | 0                                                                 | 7627    |
| Darunavir             | 637                                      | 0                                    | 39773                          | 0                                                                 | 39773   |

| Drug                     | Population in preapproval pivotal trials | Population in post-marketing studies |                                |                                                                   |       |
|--------------------------|------------------------------------------|--------------------------------------|--------------------------------|-------------------------------------------------------------------|-------|
|                          |                                          | Another indication                   | Originally-approved indication | Both in originally approved indication and in other(s) indication | Total |
| Plerixafor               | 623                                      | 1467                                 | 11644                          | 339                                                               | 13450 |
| Degarelix                | 610                                      | 791                                  | 10020                          | 0                                                                 | 10811 |
| Deferasirox              | 586                                      | 153                                  | 8609                           | 50                                                                | 8812  |
| Dasatinib                | 565                                      | 9267                                 | 9090                           | 963                                                               | 19320 |
| Sunitinib                | 481                                      | 16462                                | 18362                          | 2496                                                              | 37320 |
| Panitumumab              | 461                                      | 5197                                 | 16874                          | 514                                                               | 22585 |
| Maraviroc                | 448                                      | 560                                  | 11397                          | 0                                                                 | 11957 |
| Pazopanib                | 435                                      | 10363                                | 8060                           | 909                                                               | 19332 |
| Tolvaptan                | 418                                      | 12221                                | 356                            | 975                                                               | 13552 |
| Ambrisentan              | 393                                      | 715                                  | 11585                          | 0                                                                 | 12300 |
| Collagenase clostridium  | 374                                      | 3897                                 | 0                              | 0                                                                 | 3897  |
| Lapatinib                | 324                                      | 7678                                 | 37714                          | 489                                                               | 45881 |
| Methylnaltrexone bromide | 321                                      | 1359                                 | 2222                           | 0                                                                 | 3581  |
| Eltrombopag              | 232                                      | 2957                                 | 2533                           | 100                                                               | 5590  |
| Retapamulin              | 210                                      | 267                                  | 4417                           | 135                                                               | 4819  |
| Nilotinib                | 196                                      | 2431                                 | 8531                           | 4695                                                              | 15657 |
| Lenalidomide             | 193                                      | 19105                                | 39873                          | 1827                                                              | 60805 |
| Nelarabine               | 190                                      | 35                                   | 3069                           | 0                                                                 | 3104  |
| Ofatumumab               | 154                                      | 3076                                 | 2595                           | 2317                                                              | 7988  |
| Romiplostim              | 125                                      | 543                                  | 1084                           | 0                                                                 | 1627  |
| Idursulfase              | 96                                       | 0                                    | 408                            | 0                                                                 | 408   |
| Sapropterin              | 88                                       | 1133                                 | 5195                           | 0                                                                 | 6328  |
| Eculizumab               | 87                                       | 3861                                 | 2204                           | 0                                                                 | 6065  |
| Mecasermin               | 70                                       | 623                                  | 4668                           | 0                                                                 | 5291  |
| Riloncept                | 47                                       | 2765                                 | 25                             | 0                                                                 | 2790  |
| Galsulfase               | 39                                       | 0                                    | 269                            | 0                                                                 | 269   |
| Canakinumab              | 31                                       | 15157                                | 261                            | 0                                                                 | 15418 |
| Velaglucerase alfa       | 25                                       | 0                                    | 67                             | 0                                                                 | 67    |
| Alglucidase              | 18                                       | 0                                    | 803                            | 0                                                                 | 803   |

Supplemental file S6 bis: Location of post-marketing studies (sample size by location)

|                         | Location      |        |        |                        |                        |                 |                                 |
|-------------------------|---------------|--------|--------|------------------------|------------------------|-----------------|---------------------------------|
|                         | North America | Europa | Others | North America + Europa | North America + Others | Europa + Others | North America + Europa + Others |
| Abatacept               | 2267          | 2801   | 1575   | 1255                   | 1715                   | 0               | 9390                            |
| Alglucidase             | 633           | 5      | 0      | 83                     | 22                     | 20              | 40                              |
| Aliskiren               | 8269          | 3870   | 5760   | 5467                   | 975                    | 3097            | 33667                           |
| Ambrisentan             | 2128          | 6116   | 196    | 64                     | 524                    | 0               | 2330                            |
| Anidulafungin           | 1115          | 225    | 214    | 0                      | 282                    | 21              | 776                             |
| Asenapine maleate       | 950           | 0      | 0      | 0                      | 0                      |                 | 0                               |
| Canakinumab             | 164           | 320    | 34     | 1037                   | 0                      | 274             | 13569                           |
| Certolizumab pegol      | 7278          | 5383   | 2401   | 3225                   | 271                    | 0               | 6265                            |
| Collagenase clostridium | 1402          | 541    | 79     | 0                      | 1286                   | 0               | 400                             |
| Dabigatran              | 272415        | 47930  | 9639   | 636                    | 0                      | 7096            | 21220                           |
| Darunavir               | 755           | 2880   | 4076   | 12                     | 1213                   | 576             | 2940                            |
| Dasatinib               | 7476          | 2941   | 1139   | 768                    | 195                    | 484             | 5866                            |
| Deferasirox             | 1473          | 1023   | 1148   | 0                      | 0                      | 2506            | 2575                            |
| Degarelix               | 1613          | 5646   | 1522   | 783                    | 0                      | 0               | 1147                            |
| Denosumab               | 1168          | 4547   | 2692   | 427                    | 0                      | 1439            | 16134                           |
| Doripenem               | 82            | 195    | 818    | 52                     | 0                      | 0               | 1911                            |
| Dronedarone             | 480           | 4143   | 279    | 0                      | 0                      | 556             | 5436                            |
| Eculizumab              | 4683          | 447    | 52     | 60                     | 92                     | 80              | 463                             |
| Eltrombopag             | 1486          | 458    | 992    | 82                     | 0                      | 100             | 1059                            |
| Entecavir               | 807           | 1096   | 21848  | 4                      | 200                    | 184             | 14460                           |
| Etravirine              | 857           | 1730   | 570    | 30                     | 671                    | 279             | 536                             |
| Exenatide               | 371779        | 5876   | 10283  | 736                    | 3323                   | 2963            | 25151                           |
| Febuxostat              | 5473          | 0      | 1424   | 0                      | 7500                   | 0               | 744                             |
| Fesoterodine fumarate   | 4555          | 1231   | 2245   | 0                      | 0                      | 794             | 8210                            |

|                          | Location      |        |        |                        |                        |                 |                                 |
|--------------------------|---------------|--------|--------|------------------------|------------------------|-----------------|---------------------------------|
|                          | North America | Europa | Others | North America + Europa | North America + Others | Europa + Others | North America + Europa + Others |
| Galsulfase               | 10            | 0      | 0      | 0                      | 200                    | 0               | 59                              |
| Golimumab                | 5459          | 5031   | 1361   | 706                    | 11                     | 120             | 811                             |
| Idursulfase              | 0             | 0      | 81     | 79                     | 0                      | 108             | 118                             |
| Lacosamide               | 1597          | 4167   | 946    | 1210                   | 0                      | 0               | 3281                            |
| Lapatinib                | 5446          | 9359   | 2989   | 502                    | 1106                   | 876             | 22398                           |
| Lenalidomide             | 22422         | 19825  | 1874   | 1804                   | 1916                   | 1972            | 8846                            |
| Liraglutide              | 15787         | 12960  | 13865  | 717                    | 0                      | 415             | 26892                           |
| Maraviroc                | 1268          | 1849   | 561    | 129                    | 876                    | 186             | 5698                            |
| Mecasermin               | 2073          | 3198   | 0      | 0                      | 0                      | 0               | 0                               |
| Methoxy polyethylene     | 340           | 13375  | 4841   | 0                      | 0                      | 2828            | 718                             |
| Methylnaltrexone bromide | 1968          | 31     | 0      | 0                      | 0                      | 0               | 1462                            |
| Micafungin               | 37521         | 664    | 1518   | 0                      | 84                     | 619             | 836                             |
| Nelarabine               | 95            | 720    | 13     | 0                      | 36                     | 40              | 1900                            |
| Nepafenac                | 5927          | 227    | 1021   | 0                      | 0                      | 0               | 0                               |
| Nilotinib                | 1660          | 4393   | 1964   | 175                    | 512                    | 218             | 2882                            |
| Ofatumumab               | 2401          | 1549   | 20     | 60                     | 14                     | 122             | 3294                            |
| Paliperidone             | 4400          | 1064   | 10125  | 0                      | 838                    | 4753            | 11816                           |
| Panitumumab              | 2888          | 8858   | 164    | 375                    | 0                      | 0               | 1700                            |
| Pazopanib                | 5947          | 5436   | 2684   | 374                    | 207                    | 102             | 4518                            |
| Plerixafor               | 2374          | 850    | 164    | 0                      | 61                     | 46              | 0                               |
| Posaconazole             | 154           | 1370   | 126    | 96                     | 0                      | 0               | 600                             |
| Prasugrel                | 23597         | 42550  | 7015   | 4760                   | 17372                  | 0               | 26550                           |
| Raltegravir              | 3106          | 4949   | 8048   | 366                    | 3156                   | 1173            | 4308                            |
| Ranibizumab              | 17679         | 20576  | 9883   | 694                    | 232                    | 3832            | 33851                           |
| Ranolazine               | 4524          | 551    | 310    | 0                      | 0                      | 0               | 5102                            |

|                    | Location      |        |        |                        |                        |                 |                                 |
|--------------------|---------------|--------|--------|------------------------|------------------------|-----------------|---------------------------------|
|                    | North America | Europa | Others | North America + Europa | North America + Others | Europa + Others | North America + Europa + Others |
| Retapamulin        | 784           | 0      | 3000   | 0                      | 508                    | 465             | 60                              |
| Rilonacept         | 1242          | 30     | 0      | 0                      | 0                      | 244             | 1274                            |
| Romiplostim        | 280           | 119    | 76     | 63                     | 62                     | 0               | 175                             |
| Rotigotine         | 2229          | 3696   | 2553   | 220                    | 601                    | 2197            | 371                             |
| Rufinamide         | 230           | 278    | 366    | 75                     | 0                      | 0               | 0                               |
| Sapropterin        | 5120          | 1018   | 0      | 0                      | 190                    | 0               | 0                               |
| Saxagliptin        | 166072        | 594    | 13757  | 0                      | 501                    | 2670            | 21205                           |
| Silodosin          | 885           | 1196   | 1559   | 0                      | 0                      | 0               | 0                               |
| Sitagliptin        | 5577          | 2079   | 12049  | 164                    | 804                    | 3770            | 21728                           |
| Sorafenib          | 17405         | 13223  | 17312  | 973                    | 2681                   | 3230            | 20954                           |
| Sunitinib          | 8448          | 7676   | 2806   | 2557                   | 2006                   | 167             | 10074                           |
| Telbivudine        | 159           | 132    | 8934   | 0                      | 308                    | 367             | 1790                            |
| Tigecycline        | 473           | 1987   | 9632   | 0                      | 1175                   | 473             | 1588                            |
| Tipranavir         | 71            | 504    | 0      | 0                      | 246                    | 0               | 84                              |
| Tocilizumab        | 2511          | 17868  | 4033   | 1054                   | 228                    | 1270            | 9070                            |
| Tolvaptan          | 1227          | 304    | 3131   | 0                      | 1300                   | 0               | 4500                            |
| Ulipristal         | 855           | 2845   | 51     | 579                    | 60                     | 542             | 0                               |
| Ustekinumab        | 2823          | 2649   | 2004   | 166                    | 0                      | 1290            | 9859                            |
| Varenicline        | 34574         | 67592  | 6523   | 1307                   | 360                    | 0               | 18706                           |
| Velaglucerase alfa | 0             | 50     | 17     | 0                      | 0                      | 0               | 0                               |
